# Supplementary material
Source: Springer Nature journal article supplement (https://www.springermedizin.de/resource/supplementary/12875_2012_887_MOESM1_ESM.pdf/9435746)

Figure 1 Model of interaction between key themes

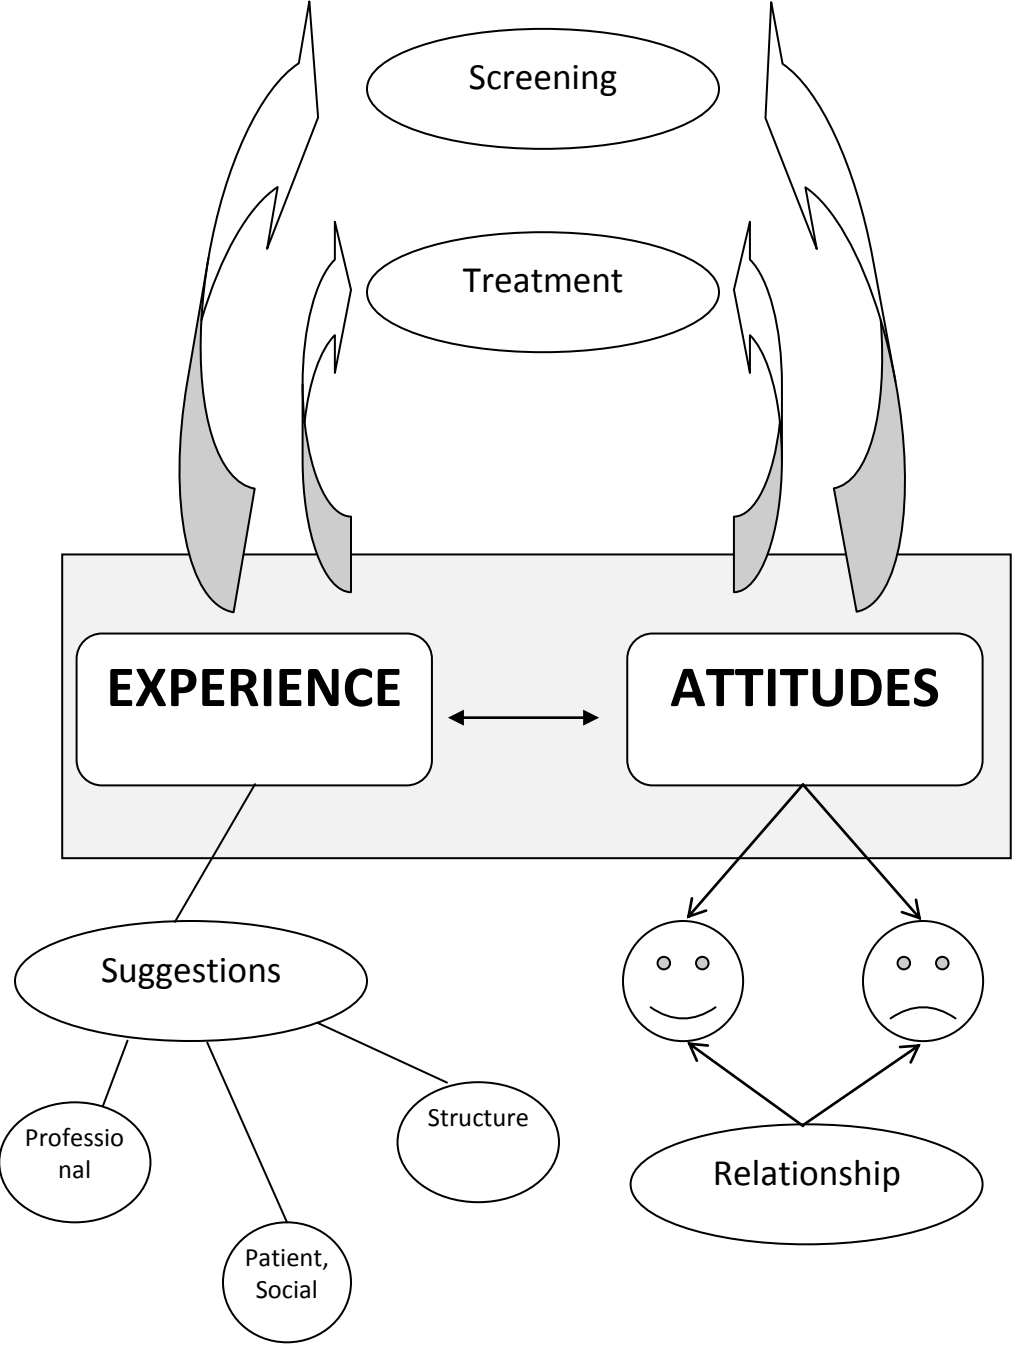

Supplement: MOESM1 [file 9435746]
